# Supplementary material for: Seed Priming with Fullerol Improves Seed Germination, Seedling Growth and Antioxidant Enzyme System of Two Winter Wheat Cultivars under Drought Stress
Source: MDPI journal article supplement (doi:10.3390/plants12061417), 2023-03-22
Supplement: s1 [file s1]

supplementary materials

Table S1 Elemental analysis of fullerol

| Weight<br>(mg) | Number | N<br>Area | C Area | H<br>Area | S<br>Area | N<br>(%) | C<br>(%) | H<br>(%) | S<br>(%) |
|----------------|--------|-----------|--------|-----------|-----------|----------|----------|----------|----------|
| 1.6660         | 1      | 0         | 19 038 | 3 829     | 53        | 0.00     | 37.97    | 2.453    | 0.186    |

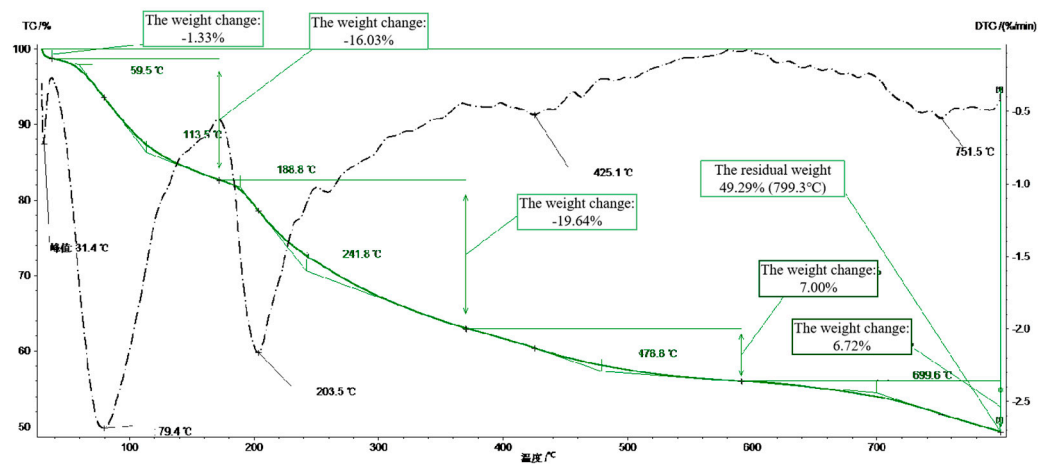

Figure S1. TG-GTA of fullerol

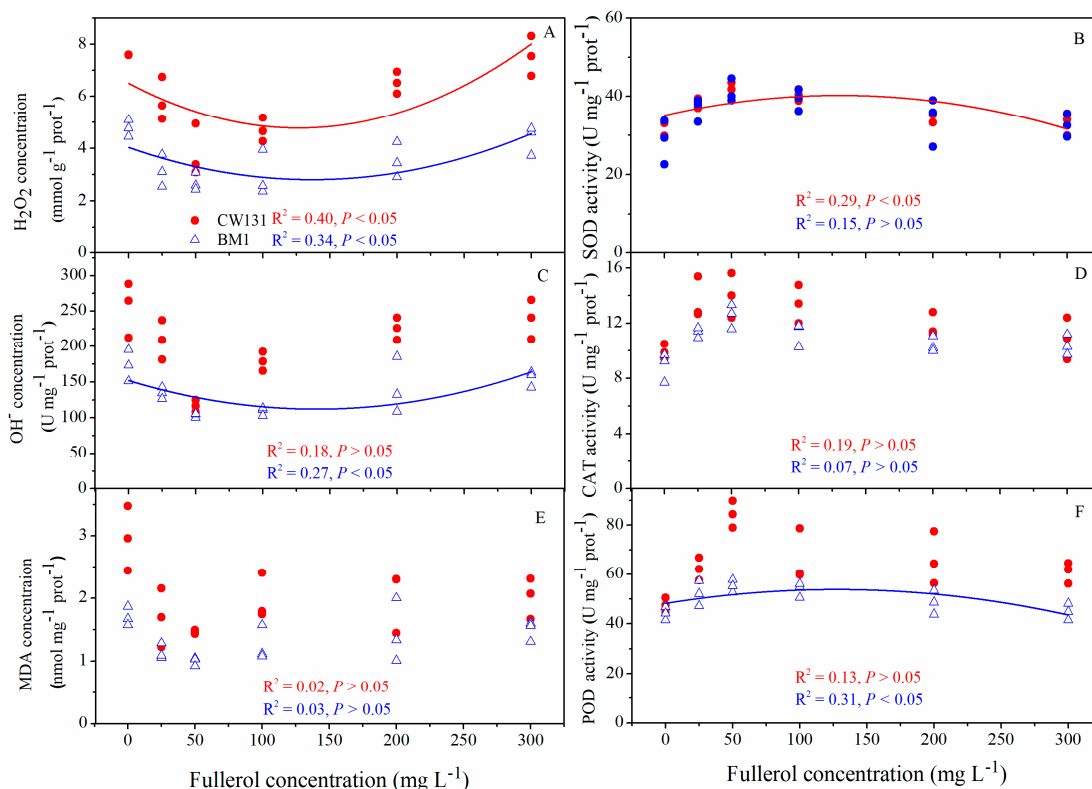

Figure S2. Contents of hydrogen peroxide (H<sub>2</sub>O<sub>2</sub>) (A), hydroxyl radical (·OH) (C), malondialdehyde (MDA) (E), and Activities of antioxidant enzymes: superoxide dismutase (SOD) (B), catalase (CAT) (D), and pe-oxidase (POD) (F) of two winter cultivars (CW131 and BM1) plotted against six concentrations of fullerol (0, 20, 50, 100, 200, 300 mg L<sup>-1</sup>).

Table S2. The result comparing the regression curve of the response of hydrogen peroxide (H<sub>2</sub>O<sub>2</sub>) to fullerol addition. These regressions were done using linear model, quadratic model, and One-way ANOVA model via lack of fit test function of the library of R.

|       | Source                                                 | df of regression | df of error | F value | P       | R <sup>2</sup> |
|-------|--------------------------------------------------------|------------------|-------------|---------|---------|----------------|
| CW131 | <b>Linear</b><br>(x as contious variable)              | 1                | 16          | 2.090   | 0.168   | 0.060          |
|       | <b>One-way ANOVA</b><br>(x as discrete variable)       | 5                | 12          | 15.980  | < 0.001 | 0.815          |
|       | <b>Quadratic</b><br>(x as contious variable)           | 2                | 15          | 6.726   | 0.008   | 0.403          |
|       | <b>lack of fit between Linear and Quadratic</b>        | -1               |             | 10.166  | 0.006   |                |
|       | <b>lack of fit between One-way ANOVA and Quadratic</b> | 3                |             | 12.149  | < 0.001 |                |
|       | <b>Linear</b><br>(x as contious variable)              | 1                | 16          | 0.624   | 0.441   | -0.023         |
| BM1   | <b>One-way ANOVA</b><br>(x as discrete variable)       | 5                | 12          | 5.825   | 0.006   | 0.587          |
|       | <b>Quadratic</b><br>(x as contious variable)           | 2                | 15          | 5.336   | 0.018   | 0.338          |
|       | <b>lack of fit between Linear and Quadratic</b>        | -1               |             | 9.709   | 0.007   |                |
|       |                                                        |                  |             |         |         |                |

|                                                        |   |       |       |
|--------------------------------------------------------|---|-------|-------|
| <b>lack of fit between One-way ANOVA and Quadratic</b> | 3 | 4.009 | 0.034 |
|--------------------------------------------------------|---|-------|-------|

Table S3. The results comparing the regression curve of the response of hydroxyl radical ( $\cdot\text{OH}$ ) to fullerol addition. These regressions were done using linear model, quadratic model, and One-way ANOVA model via lack of fit test function of the library of R.

|              | Source                                                 | <i>df</i> of regression | <i>df</i> of error | <i>F</i> value | <i>P</i> | <i>R</i> <sup>2</sup> |
|--------------|--------------------------------------------------------|-------------------------|--------------------|----------------|----------|-----------------------|
| <b>CW131</b> | <b>Linear</b><br>(x as contious variable)              | 1                       | 16                 | 1.083          | 0.314    | 0.005                 |
|              | <b>One-way ANOVA</b><br>(x as discrete variable)       | 5                       | 12                 | 12.720         | < 0.001  | 0.775                 |
|              | <b>Quadratic</b><br>(x as contious variable)           | 2                       | 15                 | 2.844          | 0.090    | 0.178                 |
|              | <b>lack of fit between Linear and Quadratic</b>        | -1                      |                    | 4.376          | 0.054    |                       |
|              | <b>lack of fit between One-way ANOVA and Quadratic</b> | 3                       |                    | 14.270         | < 0.001  |                       |
| <b>BM1</b>   | <b>Linear</b><br>(x as contious variable)              | 1                       | 16                 | 0.292          | 0.596    | -0.043                |
|              | <b>One-way ANOVA</b><br>(x as discrete variable)       | 5                       | 12                 | 5.651          | 0.007    | 0.578                 |
|              | <b>Quadratic</b><br>(x as contious variable)           | 2                       | 15                 | 4.211          | 0.035    | 0.274                 |
|              | <b>lack of fit between Linear and Quadratic</b>        | -1                      |                    | 8.002          | 0.013    |                       |
|              | <b>lack of fit between One-way ANOVA and Quadratic</b> | 3                       |                    | 4.593          | 0.023    |                       |

Table S4. The results comparing the regression curve of the response of malondialdehyde (MDA) to fullerol addition. These regressions were done using linear model, quadratic model, and One-way ANOVA model via lack of fit test function of the library of R.

|              | Source                                                 | <i>df</i> of regression | <i>df</i> of error | <i>F</i> value | <i>P</i> | <i>R</i> <sup>2</sup> |
|--------------|--------------------------------------------------------|-------------------------|--------------------|----------------|----------|-----------------------|
| <b>CW131</b> | <b>Linear</b><br>(x as contious variable)              | 1                       | 16                 | 0.225          | 0.642    | -0.048                |
|              | <b>One-way ANOVA</b><br>(x as discrete variable)       | 5                       | 12                 | 4.800          | 0.012    | 0.528                 |
|              | <b>Quadratic</b><br>(x as contious variable)           | 2                       | 15                 | 1.214          | 0.325    | 0.025                 |
|              | <b>lack of fit between Linear and Quadratic</b>        | -1                      |                    | 2.186          | 0.160    |                       |
|              | <b>lack of fit between One-way ANOVA and Quadratic</b> | 3                       |                    | 6.328          | 0.008    |                       |
| <b>BM1</b>   | <b>Linear</b><br>(x as contious variable)              | 1                       | 16                 | 0.546          | 0.471    | -0.027                |
|              | <b>One-way ANOVA</b><br>(x as discrete variable)       | 5                       | 12                 | 2.974          | 0.057    | 0.367                 |
|              | <b>Quadratic</b><br>(x as contious variable)           | 2                       | 15                 | 1.243          | 0.317    | 0.028                 |
|              | <b>lack of fit between Linear and Quadratic</b>        | -1                      |                    | 1.909          | 0.187    |                       |
|              | <b>lack of fit between One-way ANOVA and Quadratic</b> | 3                       |                    | 3.683          | 0.043    |                       |

Table S5. The results comparing the regression curve of the response of superoxide dismutase (SOD) to fullerol addition. These regressions were done using linear model, quadratic model, and One-way ANOVA model via lack of fit test function of the library of R.

|       | Source                                                 | <i>df</i> of regression | <i>df</i> of error | <i>F</i> value | <i>P</i> | <i>R</i> <sup>2</sup> |
|-------|--------------------------------------------------------|-------------------------|--------------------|----------------|----------|-----------------------|
| CW131 | <b>Linear</b><br>(x as contious variable)              | 1                       | 16                 | 1.191          | 0.291    | 0.011                 |
|       | <b>One-way ANOVA</b><br>(x as discrete variable)       | 5                       | 12                 | 20.050         | < 0.001  | 0.849                 |
|       | <b>Quadratic</b><br>(x as contious variable)           | 2                       | 15                 | 4.408          | 0.031    | 0.286                 |
|       | <b>lack of fit between Linear and Quadratic</b>        | -1                      |                    | 7.166          | 0.017    |                       |
|       | <b>lack of fit between One-way ANOVA and Quadratic</b> | 3                       |                    | 19.568         | < 0.001  |                       |
|       | <b>Linear</b><br>(x as contious variable)              | 1                       | 16                 | 0.252          | 0.623    | -0.046                |
| BM1   | <b>One-way ANOVA</b><br>(x as discrete variable)       | 5                       | 12                 | 3.707          | 0.029    | 0.443                 |
|       | <b>Quadratic</b><br>(x as contious variable)           | 2                       | 15                 | 2.521          | 0.114    | 0.152                 |
|       | <b>lack of fit between Linear and Quadratic</b>        | -1                      |                    | 4.732          | 0.046    |                       |
|       | <b>lack of fit between One-way ANOVA and Quadratic</b> | 3                       |                    | 3.618          | 0.046    |                       |
|       |                                                        |                         |                    |                |          |                       |

Table S6. The results comparing the regression curve of the response of catalase (CAT) to fullerol addition. These regressions were done using linear model, quadratic model, and One-way ANOVA model via lack of fit test function of the library of R.

|       | Source                                                 | <i>df</i> of regression | <i>df</i> of error | <i>F</i> value | <i>P</i> | <i>R</i> <sup>2</sup> |
|-------|--------------------------------------------------------|-------------------------|--------------------|----------------|----------|-----------------------|
| CW131 | <b>Linear</b><br>(x as contious variable)              | 1                       | 16                 | 0.953          | 0.344    | -0.003                |
|       | <b>One-way ANOVA</b><br>(x as discrete variable)       | 5                       | 12                 | 4.887          | 0.011    | 0.533                 |
|       | <b>Quadratic</b><br>(x as contious variable)           | 2                       | 15                 | 3.053          | 0.077    | 0.195                 |
|       | <b>lack of fit between Linear and Quadratic</b>        | -1                      |                    | 4.920          | 0.042    |                       |
|       | <b>lack of fit between One-way ANOVA and Quadratic</b> | 3                       |                    | 4.631          | 0.023    |                       |
|       | <b>Linear</b><br>(x as contious variable)              | 1                       | 16                 | 0.063          | 0.805    | -0.058                |
| BM1   | <b>One-way ANOVA</b><br>(x as discrete variable)       | 5                       | 12                 | 7.502          | 0.002    | 0.657                 |
|       | <b>Quadratic</b><br>(x as contious variable)           | 2                       | 15                 | 1.627          | 0.229    | 0.069                 |
|       | <b>lack of fit between Linear and Quadratic</b>        | -1                      |                    | 3.182          | 0.095    |                       |
|       | <b>lack of fit between One-way ANOVA and Quadratic</b> | 3                       |                    | 9.562          | 0.002    |                       |

Table S7. The results comparing the regression curve of the response of peroxidase (POD) to fullerol addition. These regressions were done using linear model, quadratic model, and One-way ANOVA model via lack of fit test function of the library of R.

|       | Source                                                 | <i>df</i> of regression | <i>df</i> of error | <i>F</i> value | <i>P</i> | <i>R</i> <sup>2</sup> |
|-------|--------------------------------------------------------|-------------------------|--------------------|----------------|----------|-----------------------|
| CW131 | <b>Linear</b><br>(x as continuous variable)            | 1                       | 16                 | 0.025          | 0.876    | −0.061                |
|       | <b>One-way ANOVA</b><br>(x as discrete variable)       | 5                       | 12                 | 8.299          | 0.001    | 0.682                 |
|       | <b>Quadratic</b><br>(x as continuous variable)         | 2                       | 15                 | 2.287          | 0.136    | 0.132                 |
|       | <b>lack of fit between Linear and Quadratic</b>        | −1                      |                    | 4.544          | 0.050    |                       |
|       | <b>lack of fit between One-way ANOVA and Quadratic</b> | 3                       |                    | 9.665          | 0.002    |                       |
|       | <b>Linear</b><br>(x as continuous variable)            | 1                       | 16                 | 1.591          | 0.225    | 0.034                 |
|       | <b>One-way ANOVA</b><br>(x as discrete variable)       | 5                       | 12                 | 4.782          | 0.012    | 0.527                 |
| BM1   | <b>Quadratic</b><br>(x as continuous variable)         | 2                       | 15                 | 4.778          | 0.025    | 0.308                 |
|       | <b>lack of fit between Linear and Quadratic</b>        | −1                      |                    | 7.335          | 0.016    |                       |
|       | <b>lack of fit between One-way ANOVA and Quadratic</b> | 3                       |                    | 3.312          | 0.057    |                       |
|       |                                                        |                         |                    |                |          |                       |
